# Supplementary material for: In Vitro Anti-Inflammatory Activities of Fucoidans from Five Species of Brown Seaweeds
Source: MDPI journal article supplement (doi:10.3390/md20100606), 2022-09-27
Supplement: s1 [file s1]

## In-Vitro Anti-Inflammatory Activities of Fucoidans from Five Species of Brown Seaweeds

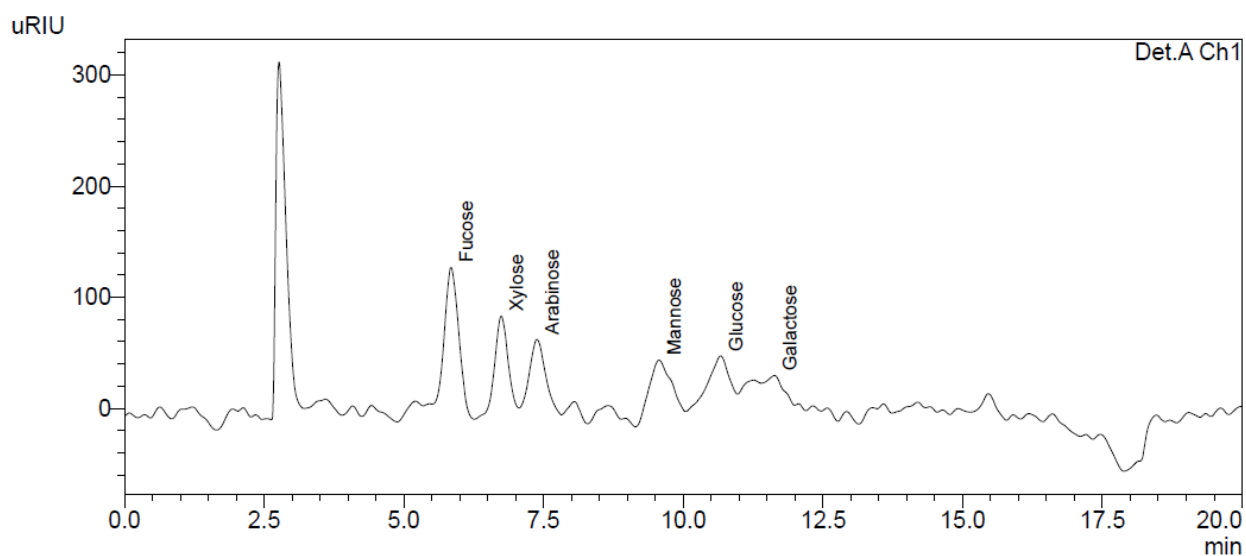

Figure S1. Typical HPLC chromatogram of the reference monosaccharides

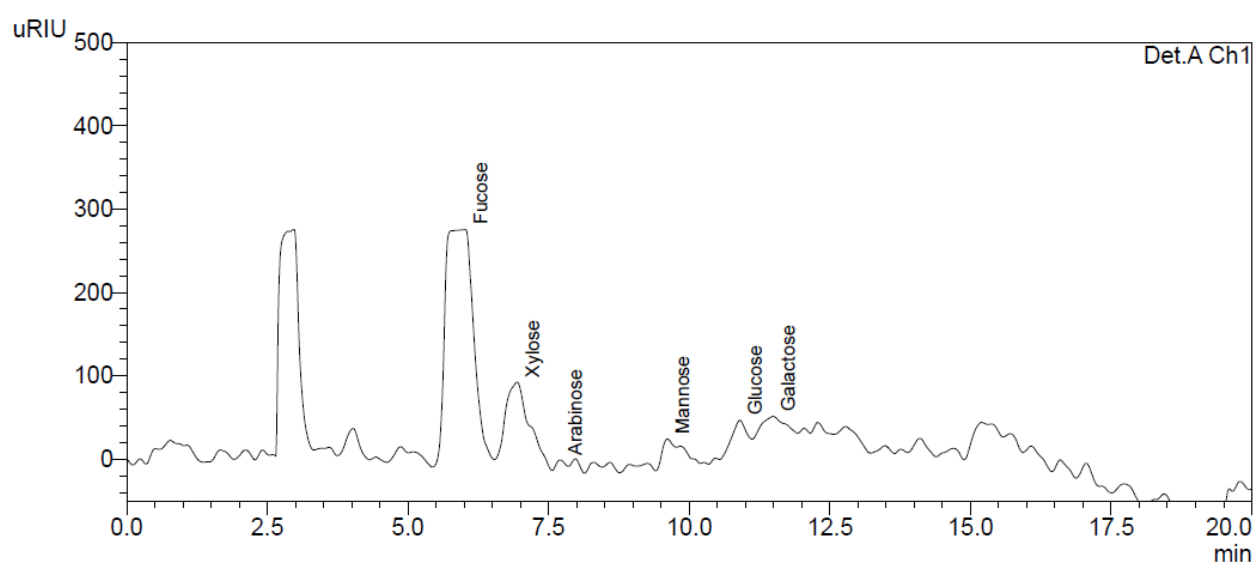

Figure S2. Typical HPLC chromatogram of sample FV1
